# Supplementary material for: Synergistic Effect of Composite Nickel Phosphide Nanoparticles and Carbon Fiber on the Enhancement of Salivary Enzyme-Free Glucose Sensing
Source: MDPI journal article supplement (doi:10.3390/bios13010049), 2022-12-29
Supplement: s1 [file s1]

# Synergistic Effect of Composite Nickel Phosphide Nanoparticles and Carbon Fiber on the Enhancement of Salivary Enzyme-Free Glucose Sensing

Tania P. Brito <sup>1,2,3</sup>, Nicole Butto-Miranda <sup>4</sup>, Andónico Neira-Carrillo <sup>4</sup>, Soledad Bollo <sup>1,\*</sup> and Domingo Ruíz-León <sup>2,\*</sup>

<sup>1</sup> Centro de Investigación de Procesos Redox (CiPRex), Facultad de Ciencias Químicas y Farmacéuticas, Universidad de Chile, Santiago 8330015, Chile

<sup>2</sup> Laboratorio de Fisicoquímica y Electroquímica del estado Sólido, Facultad de Química y Biología, Universidad de Santiago de Chile, Santiago 8330015, Chile

<sup>3</sup> Departamento de Ingeniería Metalúrgica, Facultad de Ingeniería, Universidad de Santiago de Chile, Santiago 8330015, Chile

<sup>4</sup> Departamento de Ciencias Biológicas Animales, Facultad de Ciencias Veterinarias y Pecuarias, Universidad de Chile, Santiago 8330015, Chile

\* Correspondence: sbollo@ciq.uchile.cl (S.B.); domingo.ruiz@usach.cl (D.R.-L.)

**Figure S1:** Scanning transmission electron microscopy (STEM) of the (a) *in situ* FC/Ni<sub>2</sub>P composite and (c) Ni<sub>2</sub>P. (b) Gaussian particle size distribution of the *in situ* FC/Ni<sub>2</sub>P composite and (d) Ni<sub>2</sub>P from STEM images.

**Figure S2:** SEM images of fibers obtained by electrospinning (a) without heat treatment, (b) dried at 110°C, (c) stabilized at 250°C, and (d) carbonized at 700°C, with their average diameters.

**Figure S3:** SEM images of fibers obtained by electrospinning (a) without heat treatment, (b) dried at 110°C, (c) stabilized at 250°C, and (d) carbonized/reduction at 700°C, with their average diameters.

**Figure S4:** EDX spectrum per point of Figure 2, corresponding to FC/Ni<sub>2</sub>P *in situ* composite.

**Table S1:** Summary EDX analysis by point of the *in situ* FC/Ni<sub>2</sub>P composite of figure 2.

**Figure S5:** Thermogravimetric analysis (TGA) of *in situ* FC/ Ni<sub>2</sub>P composite.

**Figure S6:** Cyclic voltammetry of GCE/FC/Ni<sub>2</sub>P *in situ* modified electrodes in the presence (red lines) and absence of glucose (black lines) in different concentration of NaOH solution (a) pH = 10 (b) pH = 11 and (c) pH = 12. Conditions: additions of 1.00 mM glucose, scan rate= 50.0 mVs<sup>-1</sup>.

**Figure S7:** (a) Cyclic voltammetry of the GCE/FC/Ni<sub>2</sub>P *in situ* electrode in the presence of 1mM glucose at different scan rates (mVs<sup>-1</sup>). (b) the corresponding plots of current density vs the square root of scan rate.

**Figure S8:** Amperometric response of glucose in artificial saliva for standard addition method (a) 18 µM and (b) correspond to the calibration curves, corresponding to three measurements.

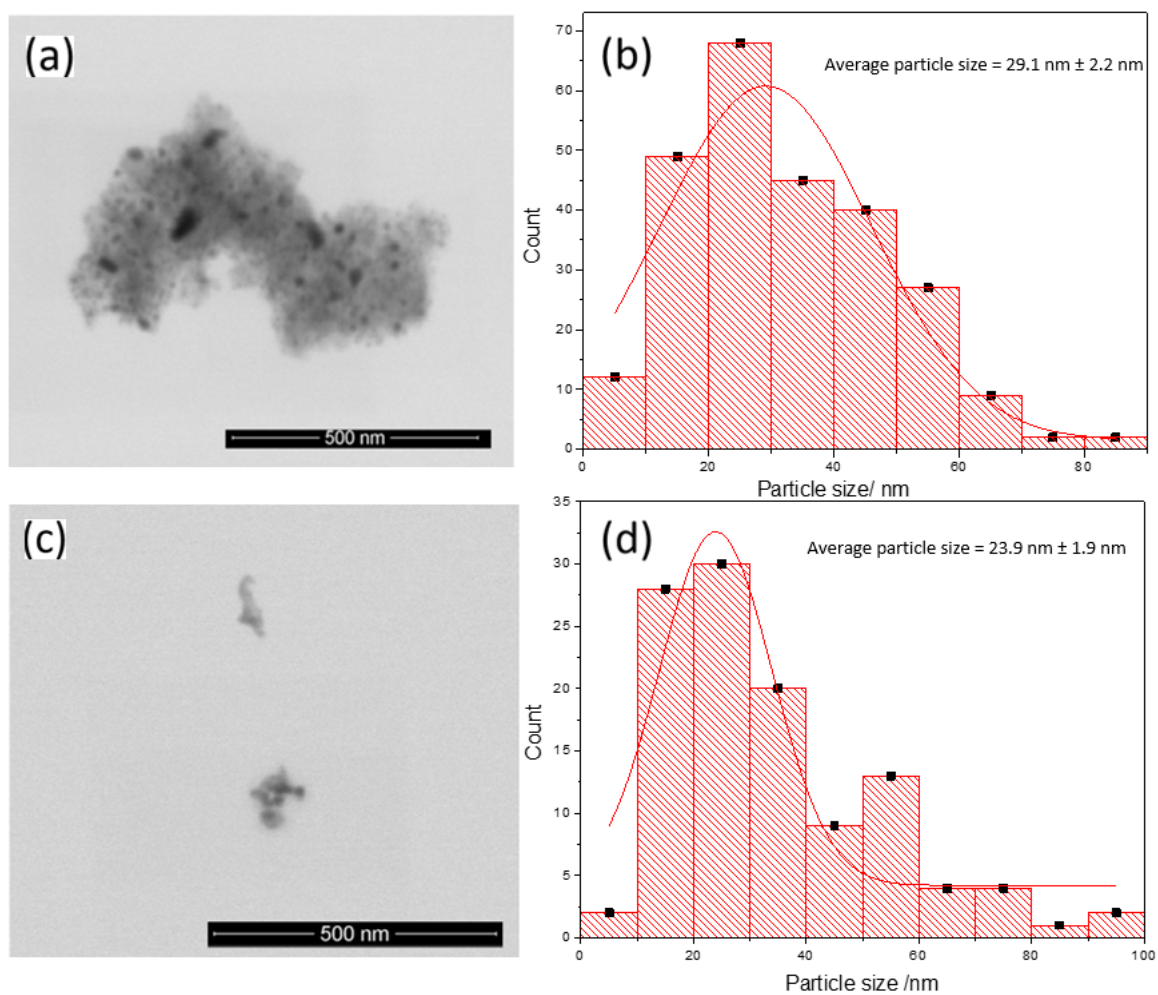

**Figure S1.** Scanning transmission electron microscopy (STEM) of the (a) *in situ* FC/Ni<sub>2</sub>P composite and (c) Ni<sub>2</sub>P. (b) Gaussian particle size distribution of the *in situ* FC/Ni<sub>2</sub>P composite and (d) Ni<sub>2</sub>P from STEM images.

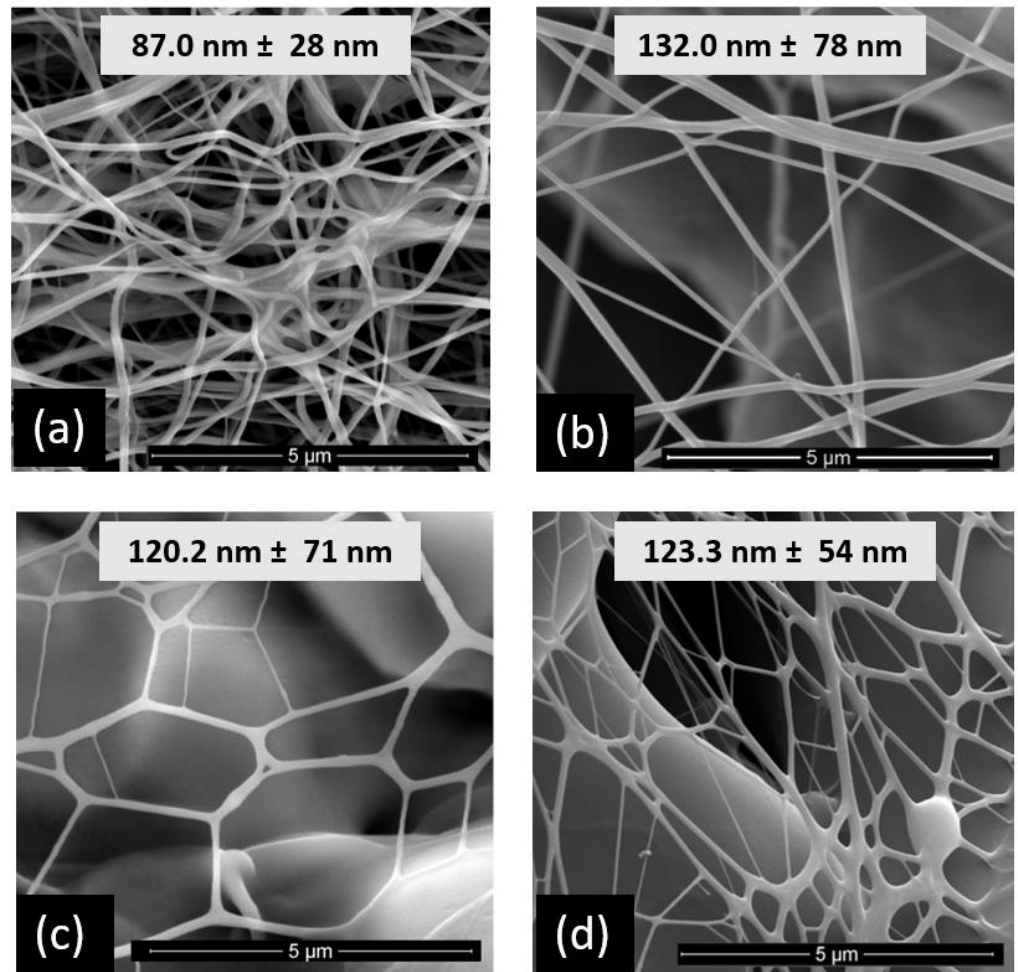

**Figure S2.** SEM images of fibers obtained by electrospinning (a) without heat treatment, (b) dried at 110°C, (c) stabilized at 250°C, and (d) carbonized at 700°C, with their average diameters.

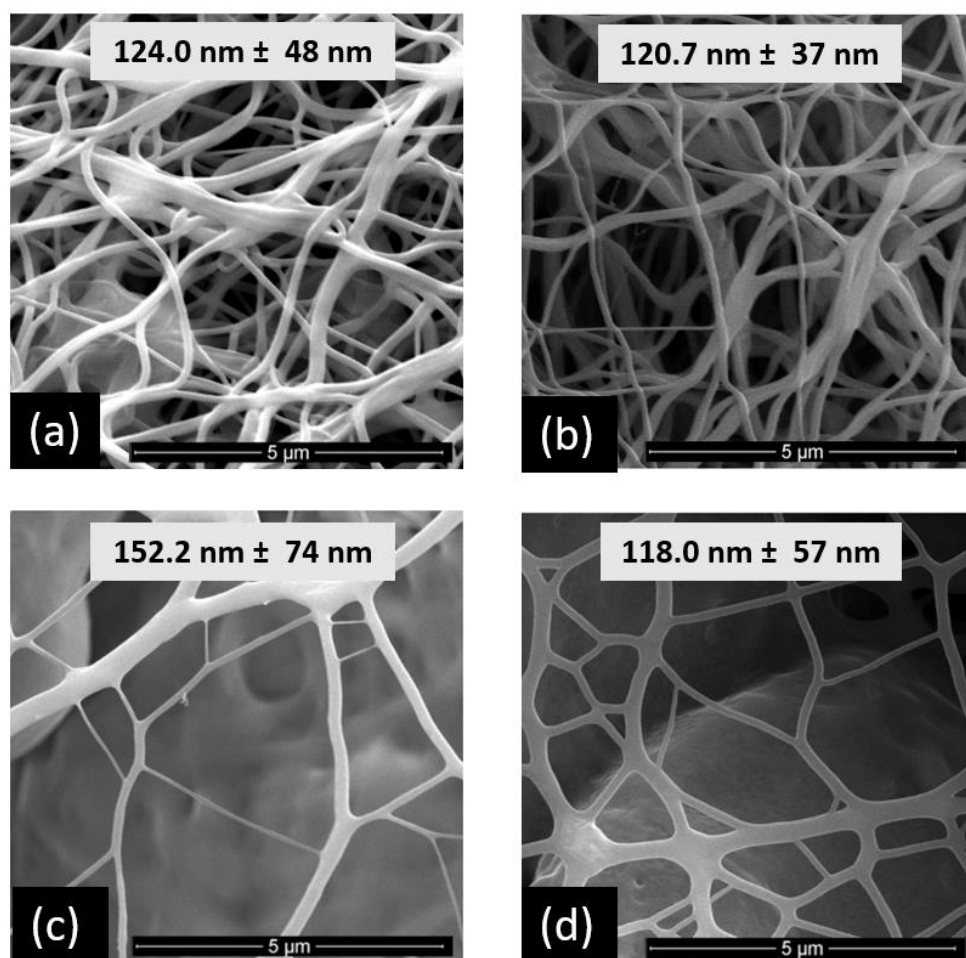

**Figure S3.** SEM images of fibers obtained by electrospinning (a) without heat treatment, (b) dried at  $110^\circ\text{C}$ , (c) stabilized at  $250^\circ\text{C}$ , and (d) carbonized/reduction at  $700^\circ\text{C}$ , with their average diameters.

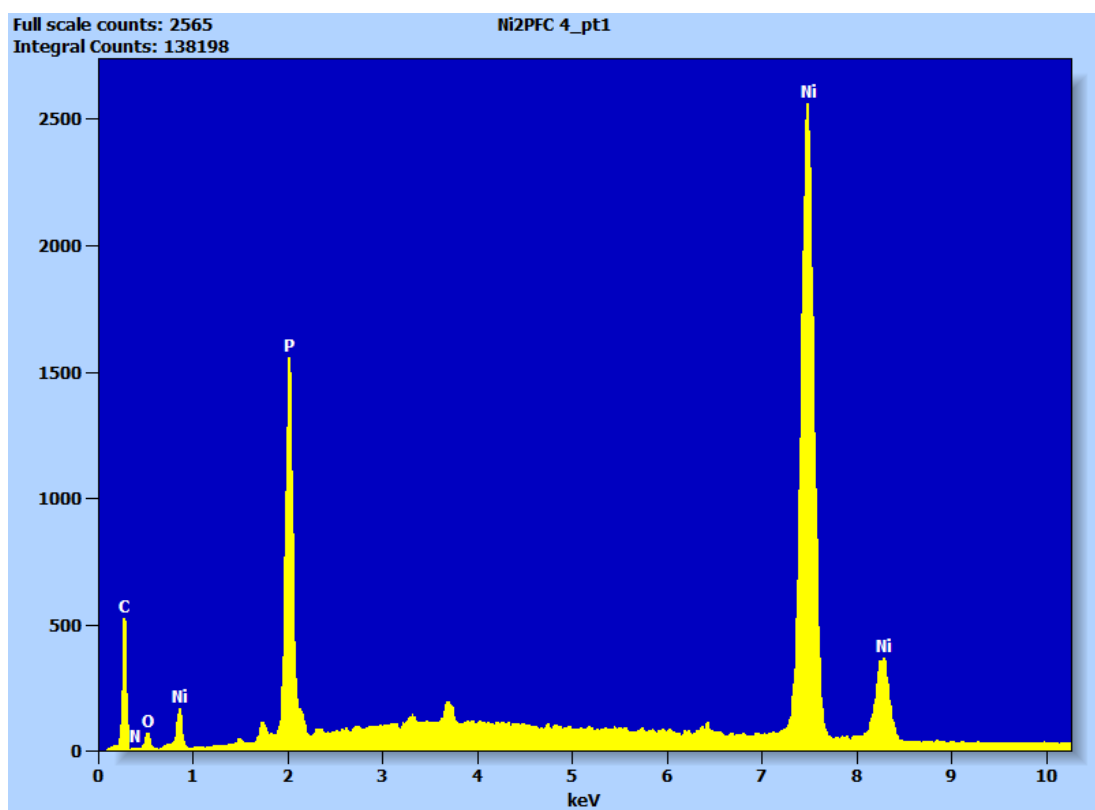

**Figure S4.** EDX spectrum per point of Figure 2, corresponding to FC/Ni<sub>2</sub>P in situ composite.

**Table S1:** Summary EDX analysis by point of the in situ FC/Ni<sub>2</sub>P composite of figure 2.

| Element | Point 1 | Point 2 | Point 3 | Point 4 | Point 5 |
|---------|---------|---------|---------|---------|---------|
|         | Atom %  |
| P K     | 31.58   | 31.90   | 31.98   | 31.62   | 32.26   |
| Ni K    | 68.42   | 68.10   | 68.02   | 68.38   | 67.74   |
|         | 100.00  | 100.00  | 100.00  | 100.00  | 100.00  |

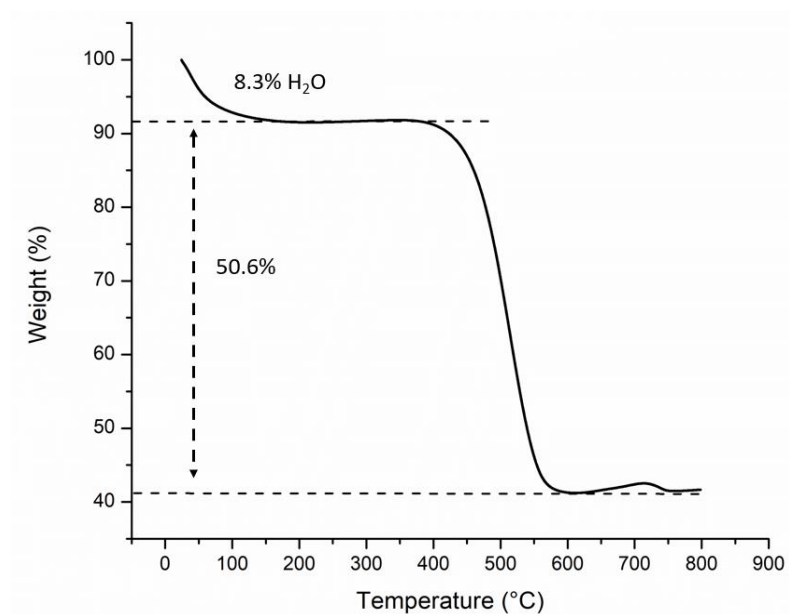

**Figure S5.** Thermogravimetric analysis (TGA) of *in situ* FC/ Ni<sub>2</sub>P composite.

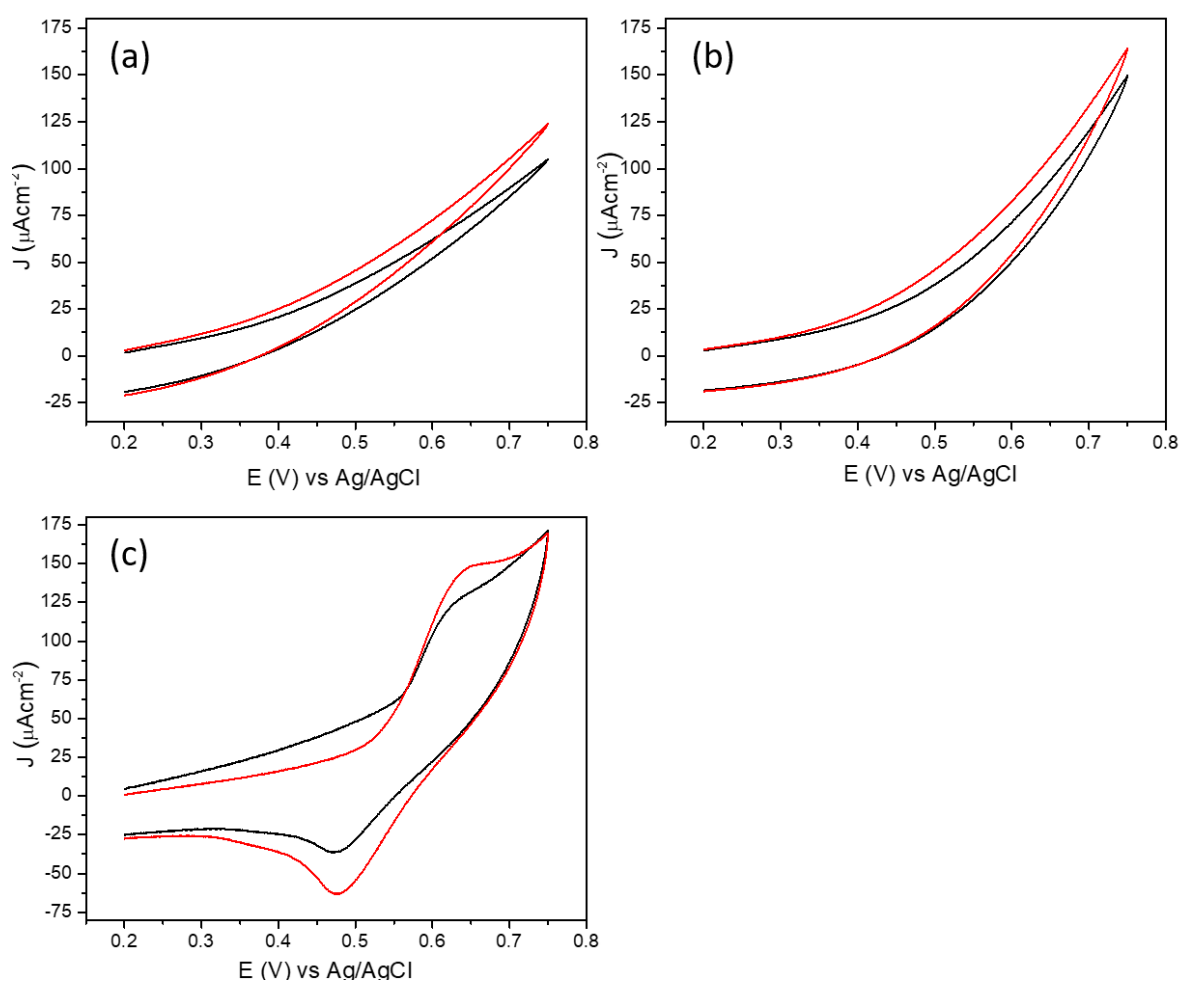

**Figure S6.** Cyclic voltammetry of GCE/FC/Ni<sub>2</sub>P *in situ* modified electrodes in the presence (red lines) and absence of glucose (black lines) in different concentration of NaOH solution (a) pH = 10 (b) pH = 11 and (c) pH = 12. Conditions: additions of 1.00 mM glucose, scan rate= 50.0 mVs<sup>-1</sup>.

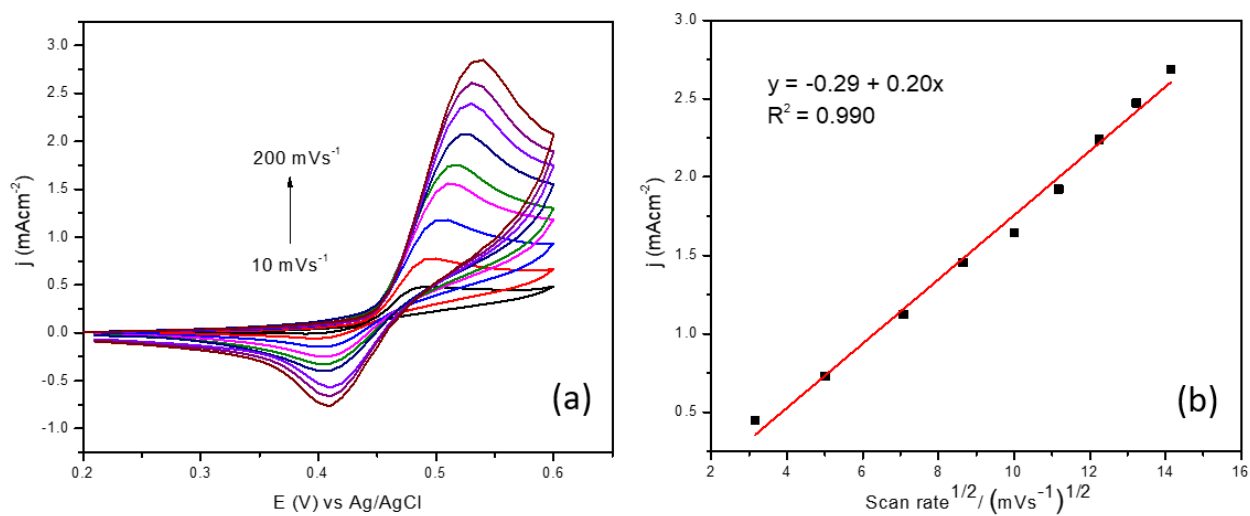

**Figure S7.** (a) Cyclic voltammetry of the GCE/FC/Ni<sub>2</sub>P *in situ* electrode in the presence of 1mM glucose at different scan rates (mVs<sup>-1</sup>). (b) the corresponding plots of current density vs the square root of scan rate.

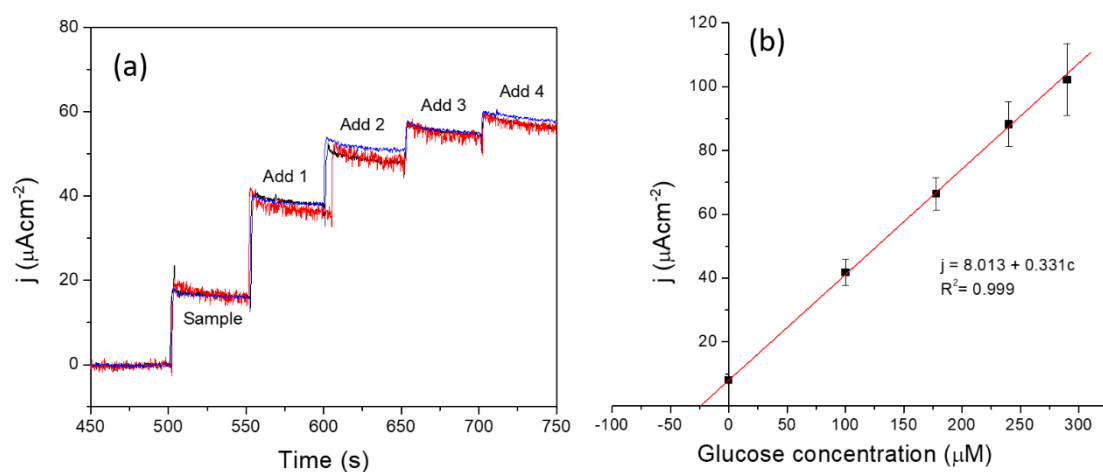

**Figure S8.** Amperometric response of glucose in artificial saliva for standard addition method (a) 18 μM and (b) correspond to the calibration curves, corresponding to three measurements.
